# Supplementary material for: Analysis of the Proteinaceous Components of the Organic Matrix of Calcitic Sclerites from the Soft Coral Sinularia sp.
Source: PLOS journal article supplement (doi:10.1371/journal.pone.0058781), 2013-03-14
Supplement: S3 (10.1371/journal.pone.0058781.s003) [file journal.pone.0058781.s003]

Fig. S3

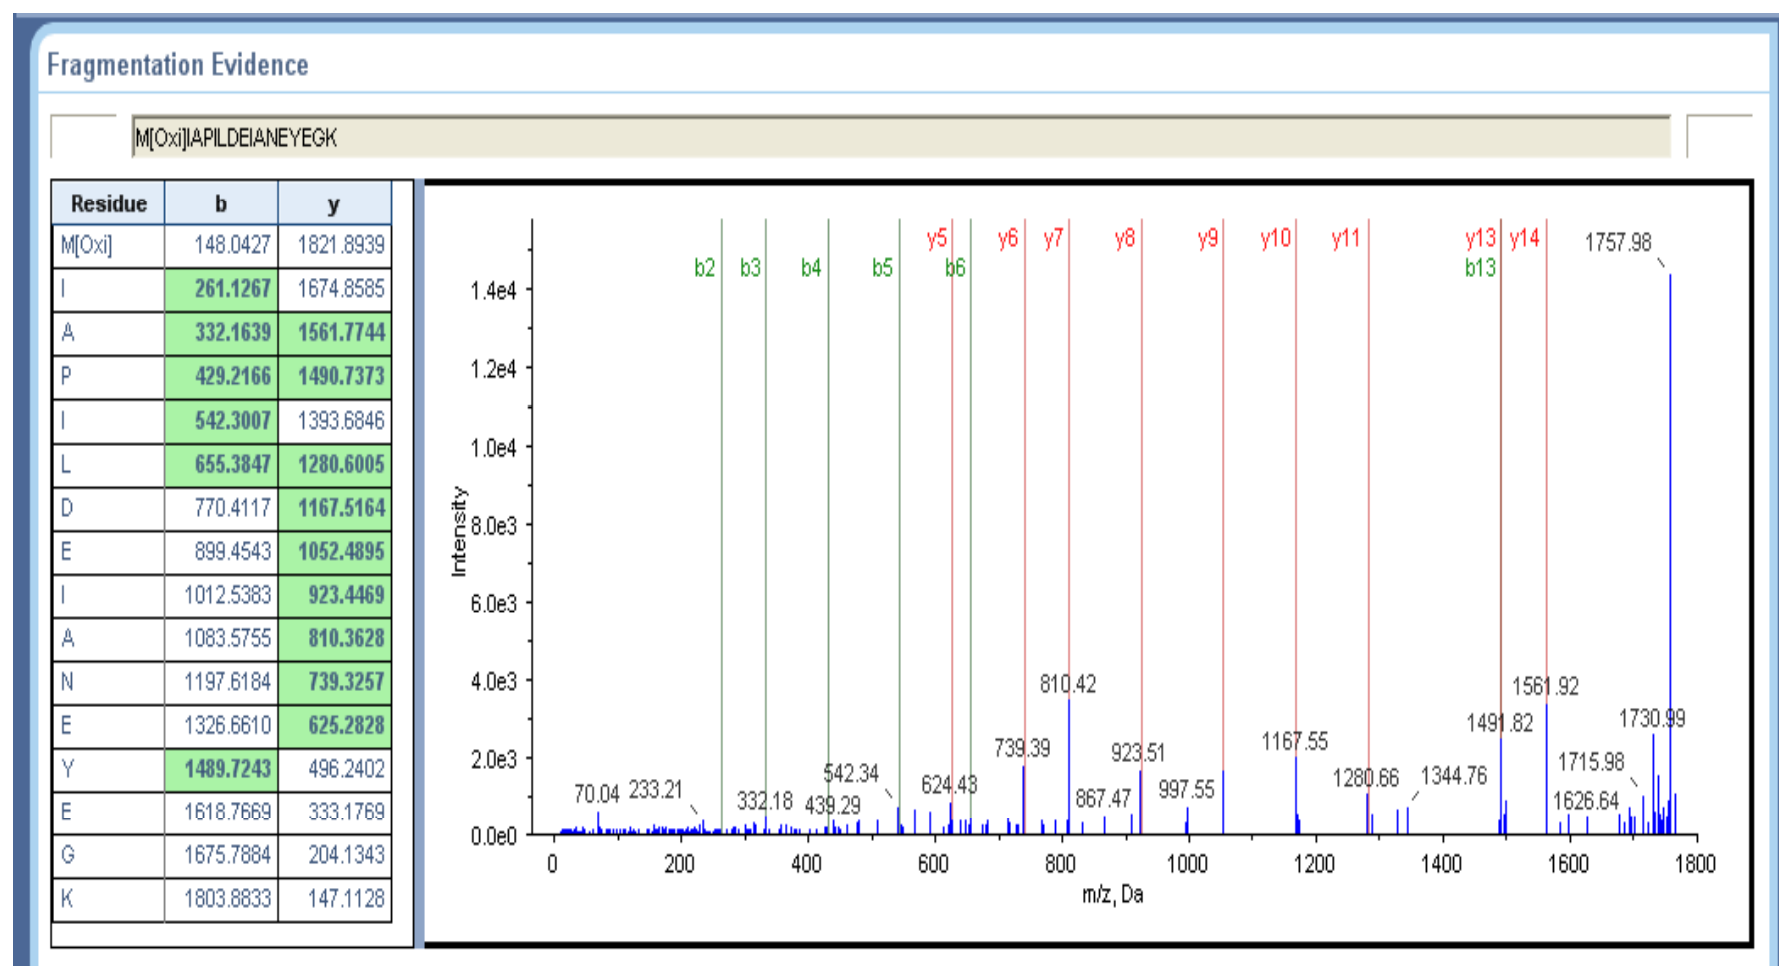

**Figure S3.** Screenshot of Thioredoxin peptide from ProteinPilot™
